# Supplementary material for: Oxygen defect regulation, catalytic mechanism, and modification of HfO2 as a novel catalyst for lithium–oxygen batteries
Source: Royal Society of Chemistry journal article supplement (doi:10.1039/d3ta06287b), 2023-12-12
Supplement: d3ta06287b1.pdf [file d3ta06287b1.pdf]

Supporting Information (SI)

**Oxygen Defect Regulation, Catalytic Mechanism, and  
Modification of HfO<sub>2</sub> as a Novel Catalyst for Lithium-oxygen  
Batteries**

Liwei Su,<sup>\*a</sup> Lei Zhang,<sup>a</sup> Xingyi Zhan,<sup>a</sup> Yifan Zhang,<sup>a</sup> Lianbang Wang<sup>\*a</sup>, Yuanhao  
Wang,<sup>b\*</sup>

<sup>a</sup> *State Key Laboratory Breeding Base of Green Chemistry-Synthesis Technology,  
College of Chemical Engineering, Zhejiang University of Technology, Hangzhou  
310014, P. R. China*

<sup>b</sup> *Hoffmann Institute of Advanced Materials, Shenzhen Polytechnic, Shenzhen 518055,  
P. R. China*

\*Corresponding author.

*E-mail:* sulawei@zjut.edu.cn (L. Su); wanglb99@zjut.edu.cn (L. Wang);  
wangyuanhao@szpt.edu.cn (Y. Wang)

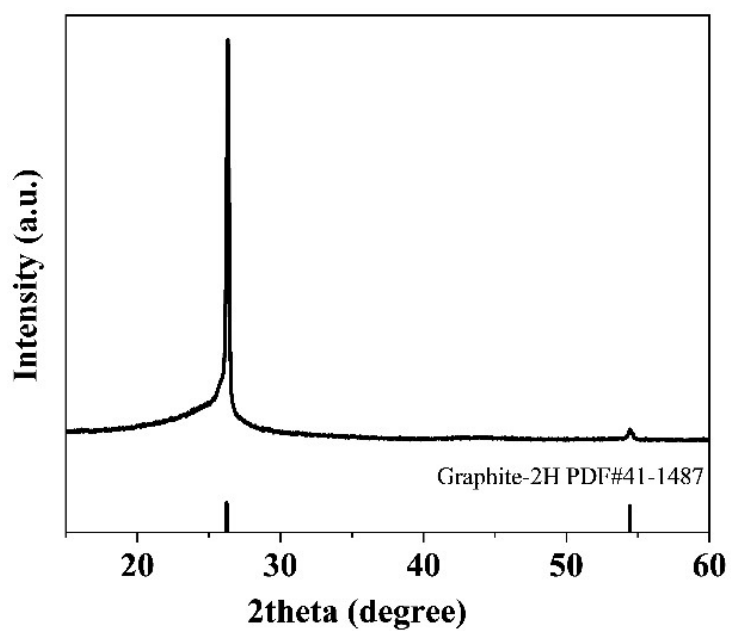

Figure S1. XRD pattern of carbon paper.

Table S1. Surface energy of HfO<sub>2</sub> crystal planes.

| Planes | A (Å <sup>2</sup> ) | E <sub>slab</sub> (eV) | E <sub>bulk</sub> (eV) | n | γ (eV/Å <sup>2</sup> ) |
|--------|---------------------|------------------------|------------------------|---|------------------------|
| (111)  | 50.12               | -361.53                | -124.12                | 3 | 0.11                   |
| (-111) | 44.76               | -353.22                | -124.12                | 3 | 0.21                   |
| (020)  | 27.28               | -236.74                | -124.12                | 2 | 0.21                   |
| (200)  | 27.98               | -240.51                | -124.12                | 2 | 0.14                   |
| (110)  | 39.08               | -362.67                | -124.12                | 3 | 0.12                   |

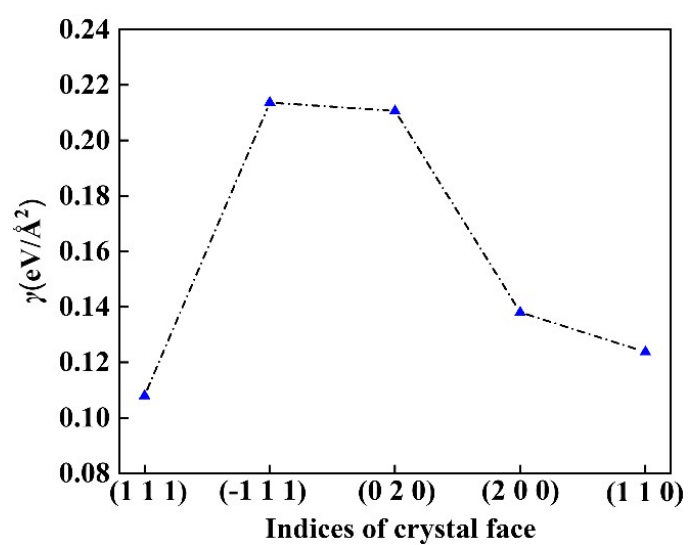

Figure S2. Surface energy curve of HfO<sub>2</sub> crystal planes.

### Computational details of the formation energy:

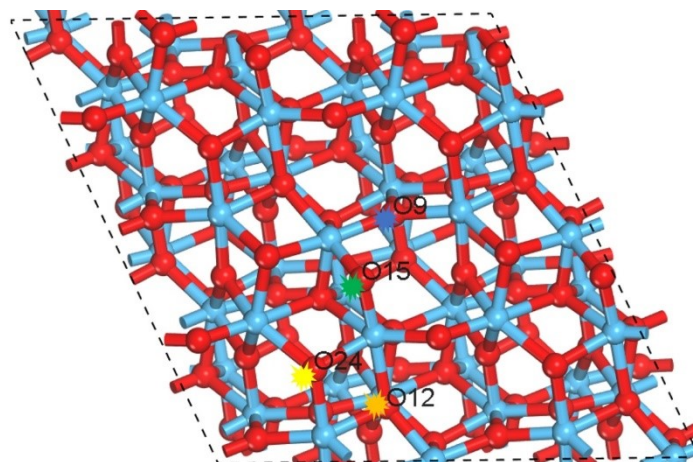

Figure S3. Schematic diagram of the vacancy types (O24, O15, O12, and O9) in 12 HfO<sub>2</sub> units.

The formation energy of oxygen vacancies ( $E_{\text{form-ovac}}$ ) was calculated using the following formula:  $(E_{\text{form-ovac}}) = (E_{\text{ovac}} + 1/2\mu(\text{O}_2)) - E_{\text{slab}}$ , where  $E_{\text{ovac}}$  is the structural energy (eV) after oxygen vacancy formation,  $\mu(\text{O}_2)$  is the chemical potential (eV) of O<sub>2</sub>, and  $E_{\text{slab}}$  is the energy (eV) of the complete (111) crystal plane. Considering the large error in the energy calculation of O<sub>2</sub> in the triplet state using DFT, the calculation process combines the ORR experimental values to calculate  $\mu(\text{O}_2)$ . That is:

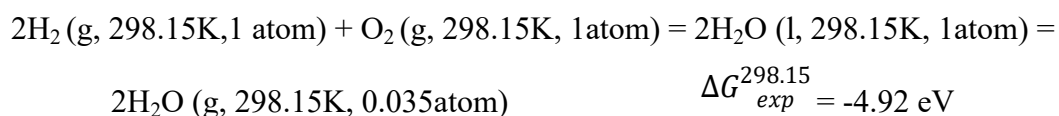

$\mu(\text{O}_2)$  can be derived from the above equation:

$$\mu(\text{O}_2(\text{g}, 298.15\text{K}, 1 \text{ atom})) = 2\mu(\text{H}_2\text{O}(\text{g}, 298.15\text{K}, 0.035 \text{ atom})) - 2\mu(\text{H}_2(\text{g}, 298.15\text{K}, 1 \text{ atom})) - \Delta G_{\text{exp}}^{298.15}$$

Table S2. Statistics data to calculate  $\mu(\text{O}_2)$ .

|                                         | $E_{\text{DFT}}$<br>(eV) | dG (eV) | G (eV) |
|-----------------------------------------|--------------------------|---------|--------|
| H <sub>2</sub> O (g, 298.15K, 0.035bar) | -14.22                   | 0.00    | -14.22 |

|                                   |       |       |       |
|-----------------------------------|-------|-------|-------|
| H <sub>2</sub> (g, 298.15K, 1bar) | -6.77 | -0.04 | -6.81 |
| O <sub>2</sub> (g, 298.15K, 1bar) |       |       | -9.90 |

Table S3. Formation energy for four types of oxygen vacancies.

|                    | E <sub>ovac_x</sub> (eV) | E <sub>2slab</sub> (eV) | μ (O <sub>2</sub> ) (eV) | E <sub>form-ovac</sub> (eV) |
|--------------------|--------------------------|-------------------------|--------------------------|-----------------------------|
| O <sub>vca24</sub> | -1434.61                 | -1446.11                | -9.90                    | 6.55                        |
| O <sub>vca15</sub> | -1434.44                 | -1446.11                | -9.90                    | 6.72                        |
| O <sub>vca12</sub> | -1434.94                 | -1446.11                | -9.90                    | 6.22                        |
| O <sub>vca9</sub>  | -1434.47                 | -1446.11                | -9.90                    | 6.69                        |

Table S4. Calculated free energies of each component involved in reactions

|                                                  | E <sub>DFT</sub> (eV) | dG (eV) | G <sub>tot</sub> (eV) |
|--------------------------------------------------|-----------------------|---------|-----------------------|
| Li <sub>2</sub> O <sub>2</sub> *HfO <sub>x</sub> | -369.1329             | 0.1743  | -368.9586             |
| LiO <sub>2</sub> *HfO <sub>2</sub>               | -375.2276             | 0.0949  | -375.1327             |
| LiO <sub>2</sub> *HfO <sub>x</sub>               | -369.8218             | 0.1279  | -369.6940             |
| Li <sub>bulk</sub>                               | -3.9738               |         | -3.9738               |
| HfO <sub>2</sub> (111)                           | -361.5251             |         | -361.5251             |
| O <sub>2</sub>                                   |                       |         | -9.90338              |
| HfO <sub>2</sub>                                 | -361.5251             |         |                       |
| HfO <sub>x</sub>                                 | -349.9398             |         |                       |

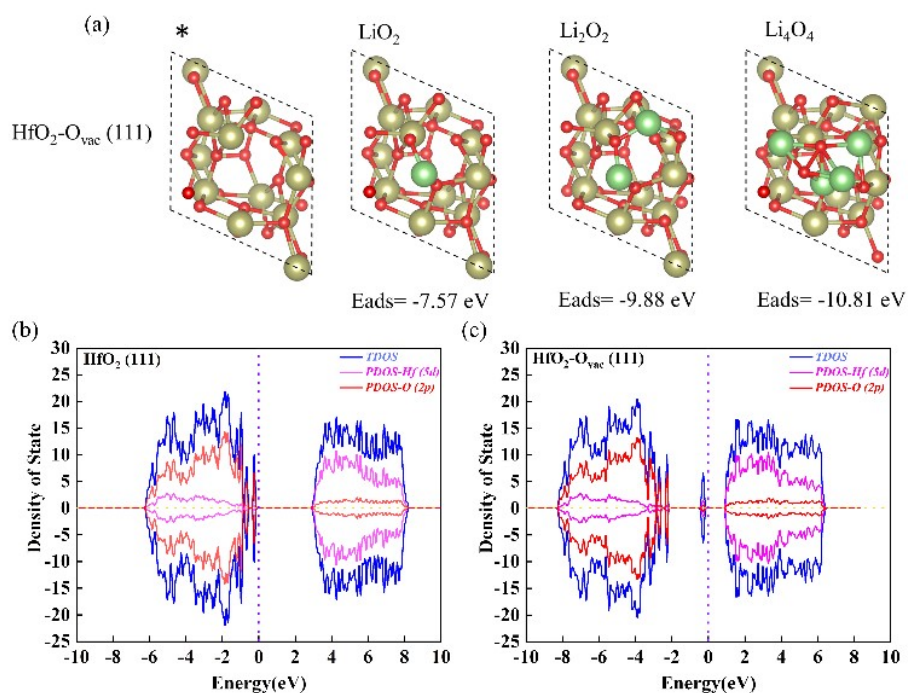

Figure S4. (a) The structure and corresponding adsorption energies of LiO<sub>x</sub> on oxygen-defect HfO<sub>2</sub>(111) plane; calculated total DOS of (b) HfO<sub>2</sub>(111) and (c) oxygen-defect HfO<sub>x</sub>(111) plane.

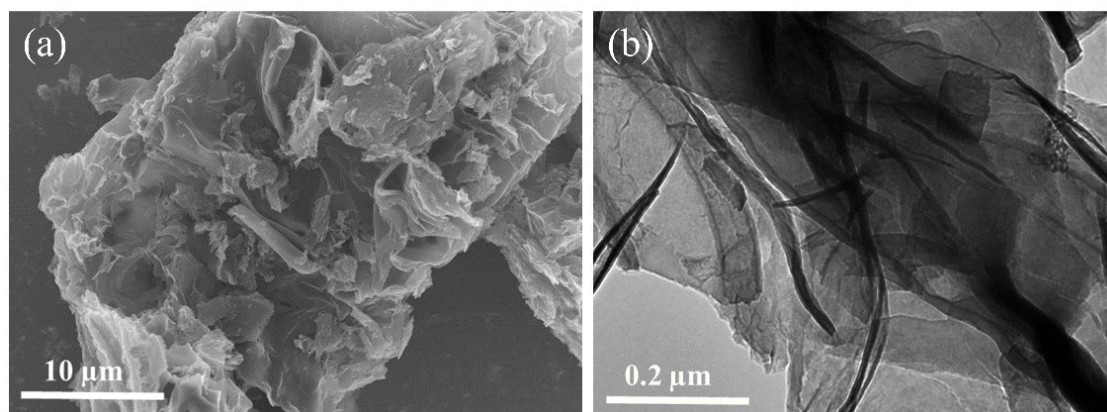

Figure S5. (a) SEM and (b) TEM images of pure NC nanosheets.

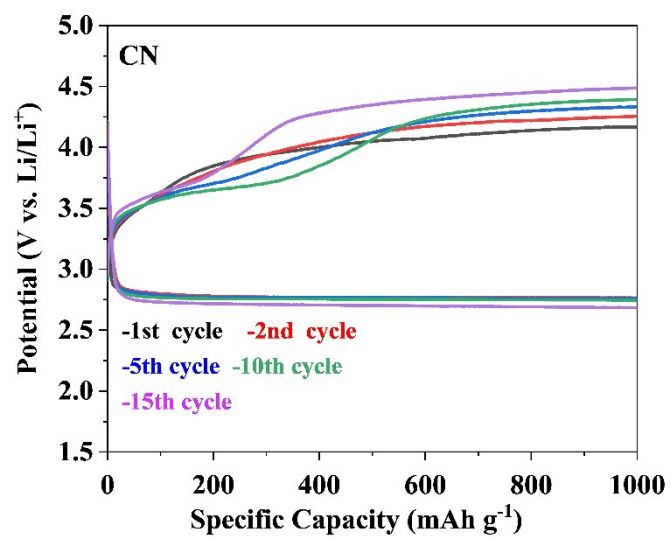

Figure S6. Charge/discharge curves of pure NC nanosheets under the limited-capacity mode.
